# Updated Model for the USA Summer 2021 CoVID-19 Resurgence

Genghmun Eng

PhD Physics 1978, University of Illinois at Urbana-Champaign

October 11, 2021

## Abstract

Over the course of the CoVID-19 pandemic, we utilized widely-available real-time data to create models for predicting its spread, and to estimate the time evolution for each of the USA CoVID-19 waves. Our recent *medrxiv.org* preprint (10.1101\_2021.08.16.21262150) examined the USA Summer 2021 resurgence, from  $\sim 6/7/2021$  up through  $\sim 8/15/2021$  (*Stage 1*). Our preprint covering this period showed that CoVID-19 could infect virtually all susceptible non-vaccinated persons, who were practicing minimal *Social Distancing* and NO *Mask-Wearing*.

The most recent USA Summer 2021 resurgence data, from  $\sim 8/13/2021$  up through  $10/7/2021$  (*Stage 2*), shows a significant "flattening of the curve". Since no new government mandates were involved, our interpretation is that some vaccine-hesitant people have now elected to become vaccinated. The *Social Distancing* parameter in our model showed a  $\sim 6.67X$  increase between *Stage 1* and *Stage 2*, indicating that this parameter also can serve as an indicator of vaccination rates. The other parameter in our model, which is associated with *Mask-Wearing*, increased from zero to a finite but relatively small value. Using the  $10/7/2021$  USA CoVID-19 overall mortality rate of  $\sim 1.60942\%$  gives these updated predictions for the total number of USA CoVID-19 cases and deaths:

$$\begin{aligned} N_{TOTAL}(3/21/2022) &\approx 52,188,000; N_{Deaths}(3/21/2022) \approx 839,900, \\ N_{TOTAL}(3/21/2024) &\approx [52,787,000; N_{Deaths}(3/21/2024) \approx 849,600, \\ &\text{assuming no new 2021 Winter Resurgence occurs (with 3 Figures)}. \end{aligned}$$

## 1 Introduction

Each new wave of the USA CoVID-19 pandemic started with a sharp rise in the total number  $N(t)$  of new cases above the prior baseline. Since the exact start of each wave is not easily determined, the  $t = 0$  point for each wave was chosen to be when the resurgence was easily identified, where  $N(t = 0) = N_o$  is the number of cases above baseline that have already occurred.

In March 2020, California Governor Gavin Newsom began the first large-scale efforts at pandemic mitigation, mandating state-wide lockdowns, "stay

at home" orders, school closures, restrictions on business operations, and new *Social Distancing* requirements, including minimum separation distances and decreased allowable occupancy. Other states soon followed.

Since then, whenever the pandemic appeared to be beaten down, restrictions were relaxed, CoVID-19 cases increased, new CoVID-19 variants appeared, and the pandemic rose up again, almost with every season. The daily number of new cases  $dN(t)/dt$  clearly shows the initial Spring 2020 pandemic start, a Summer 2020 resurgence, and a long and pernicious Winter 2020 "*Third Wave*". A  $dN(t)/dt$  uptick in Spring 2021 was actually a small "*Fourth Wave*", which would make the *present-day* Summer 2021 resurgence a "*Fifth Wave*". However, most CoVID-19 reporting sites ignore the Spring 2021 uptick, labeling the entire Summer 2021 resurgence as a "*USA Fourth Wave*".

Our mathematical modeling<sup>1-5</sup> is empirically based, and it does not predict when each new CoVID-19 wave will start, or what biological and social circumstances are causing the wave. However, once the wave has begun, our models can successfully predict its time evolution.

The standard **SEIR** (Susceptible, Exposed, Infected, and Recovered or Removed) epidemiology model starts with this basic function for exponential growth ( $R_o > 1$ ) or decay ( $R_o < 1$ ):

$$\frac{d}{dt}N(t) = +K_R(R_o - 1)N(t) = [1/t_R]N(t), \quad [1.1a]$$

$$N(t) = N_o \exp[+t/t_R], \quad [1.1b]$$

$$t_{dbl} = t_R(\ln 2), \quad [1.1c]$$

where  $t_R > 0$  is the pandemic growth rate, and  $t_{dbl}$  is the doubling-time for  $N(t)$ . Given a total population of  $N_{ALL}$ , the *uninfected population* is:

$$U(t) = [N_{ALL} - N(t)]. \quad [1.2]$$

Using Eq. [1.1a] implicitly assumes that  $N_{ALL}$  is large enough so that  $N(t) \ll N_{ALL}$  for all times of interest, so that pandemic saturation effects do not need to be separately considered.

Much of the **SEIR** modeling examines the major factors that are involved in setting the  $\{K_R, R_o, t_R\}$  values. The  $\{K_R, R_o, t_R\}$  parameters quantify how much contact the infected  $N(t)$  group has with the *uninfected population*, with those contacts determining the next  $N(t + \Delta t)$  value. This feature makes Eq. [1.1a] a local transmission model.

As such, the **SEIR** models do not explicitly consider what the  $U(t)$  *uninfected population*, as a whole, may be doing in response to the pandemic, prior to becoming infected. Factors such as *Social Distancing*, *Mask-Wearing*, *Vaccination*, and large-scale *Government Mandates*, each can affect  $U(t)$ , which then introduces new *non-local factors* into the pandemic evolution.

Following our original CoVID-19 preprint<sup>1-2</sup> of April-May 2020, the Eqs. [1.1a]-[1.1c] **SEIR** Model for pandemic evolution was first extended by introducing a new parameter  $\{\alpha_S\}$  to account for new *Social Distancing* practices among the *uninfected population*:

$$N(t) = N_o \exp\{+t/[t_R(1 + \alpha_S t)]\}, \quad [1.3a]$$

$$\lim_{t \rightarrow +\infty} [N(t)] = N_o \exp\{+1/[t_R \alpha_S]\} \equiv N_{\max}. \quad [1.3b]$$

The resulting Eq. [1.3b] shows that any non-zero *Social Distancing*  $\alpha_S$  value

results in a natural pandemic end, prior to infecting the entire  $N_{ALL}$  population. In our follow-on pre-prints<sup>3-5</sup>, this basic model was extended to handle the case when the  $[dN_{data}(t)/dt]$  data showed a post-peak exponential decay with time:

$$N(t) = N_o \exp\left\langle + \frac{t}{[t_R(1+\alpha_S t)]} \exp[-\delta_o t] \right\rangle, \quad [1.4a]$$

$$N_{\max} \equiv \max\left\{ N_o \exp\left\langle + \frac{t}{[t_R(1+\alpha_S t)]} \exp[-\delta_o t] \right\rangle \right\}, \quad [1.4b]$$

instead of the  $[1/t^2]$  dependence predicted by Eq. [1.3a]. This modification more accurately predicts when the  $\frac{d}{dt}N(t)$  peak occurs, and gives an exponential decay "tail" for the daily number of new cases.

However, post-peak, when the  $\frac{d}{dt}N(t)$  values become small, Eq. [1.4a] can reach a point where  $\frac{d}{dt}N(t) < 0$  first occurs. Although it pinpoints a particular time for the pandemic end, this value is likely inaccurate. Since  $|\frac{d}{dt}N(t)|$  is small at that point, it will usually be outside the domain of interest, as the actual pandemic will be nearly over by then, barring a follow-on resurgence.

## 2 Updated Summer 2021 Resurgence Projections

Since we have successfully modeled the various prior USA CoVID-19 waves<sup>1-5</sup> using the same few parameters, that modeling success indicates that the **response** of the  $U(t)$  *uninfected population* has been similar for each CoVID-19 wave, even if different factors were driving each new resurgence.

The latest USA Summer 2021 CoVID-19 wave follows this trend. Our 8/15/2021 preprint<sup>5</sup> showed that this latest wave started around  $\sim 6/7/2021$ . Hospital admission records indicated that unvaccinated persons primarily comprised this  $N(t)$  infected group. Interviews with those CoVID-19 patients found that many were resistant to vaccination, even when it was available.

Our modeling up through 8/15/2021 showed that the CoVID-19 spread among this group was associated with very little *Social Distancing* and virtually *NO Mask-Wearing*. As given in our prior pre-print<sup>5</sup>, the parameter values for this initial portion ("*Stage 1*") of USA Summer 2021 resurgence were:

$$\alpha_S = 0.0030, \quad [2.1a]$$

$$\delta_o = 0.000, \quad [2.1b]$$

$$t_R = 13.113 \text{ days}, \quad [2.1c]$$

$$t_{dbl} = 9.0892 \text{ days}, \quad [2.1d]$$

$$N_o[t = 0 : 6/7/2021] = [41,000], \quad [2.1e]$$

for the period of 6/7/2021 to 8/15/2021. The  $N_o[t = 0]$  value in Eq. [2.1e] shows how many resurgence cases above baseline were needed to identify that a resurgence had started, rather than being a data reporting fluctuation. These  $\{\alpha_S; \delta_o\}$  parameter values were so small that virtually every susceptible non-vaccinated USA person could potentially become infected, due to their "minimal *Social Distancing*" and "NO Mask-Wearing" practices.

The  $N(t)$  data from the next two months shows that the situation has markedly improved. The new  $N(t)$  shape changes were similar to how the original March 2020 mandates changed the course of the CoVID-19 pandemic, with the  $N(t)$  function for this wave now showing a substantial "flattening of

the curve" between mid-August 2021 and the *present-day* (10/7/2021), meriting this update.

Another commonality that appears to exist among the various USA CoVID-19 waves is that the  $U(t)$  *uninfected population* group seems to ignore the pandemic resurgence until it reaches a level where the local hospitals begin to fill up with CoVID-19 patients, and the local media fills up with their dire stories.

Updating the USA Summer 2021 resurgence with data from  $\sim 8/13/2021$  through 10/7/2021, this latter ("*Stage 2*") portion of the USA Summer 2021 resurgence now gives these new parameter values:

$$\alpha'_S = 0.0199989, \quad [2.2a]$$

$$\delta'_o = 0.0004886, \quad [2.2b]$$

$$t'_R = 20.8834 \text{ days}, \quad [2.2c]$$

$$t'_{dbl} = 14.4434 \text{ days}, \quad [2.2d]$$

$$N'_o[t = 0 : 8/13/2021] = [3, 200, 000]. \quad [2.2e]$$

The large  $N'_o[t = 0]$  value in Eq. [2.2e] likely indicates how many resurgence cases above baseline were needed before the *uninfected population* began, as a group, to alter their average behavior.

The combined *Stage 1* and *Stage 2* predictions are graphically illustrated in *Figure 1* covering the entire USA Summer 2021 CoVID-19 resurgence by itself, from  $\sim 6/7/2021$  up through 10/7/2021, as all prior CoVID-19 waves were first subtracted out as a baseline. A good datafit between the  $N(t)$  predictions and the raw  $N_{data}(t)$  values is evident, along with a clear "curve flattening" for *Stage 2* of this CoVID-19 wave.

These *Figure 1* USA Summer 2021 resurgence values were then added to the model baseline data for all the previous USA CoVID-19 waves. Those results, shown in *Figure 2*, indicate that we are presently in the  $\frac{d}{dt}N(t)$  post-peak phase, with the rather small  $\delta'_o$  value of Eq. [2.2b] giving the gradually decreasing long-tail in *Figure 2*, for the predicted USA  $\frac{d}{dt}N(t)$  future progression.

A comparison of these new  $\{t'_R, \alpha'_S, \delta'_o\}$  values and the  $\{t_R, \alpha_S, \delta_o\}$  values from all the previous USA CoVID-19 waves is shown in *Figure 3*. The Eq. [2.2a] *Social Distancing* parameter  $\alpha'_S$  for *Stage 2* is about  $\sim 6.67X$  larger than the  $\alpha_S$  value of Eq. [2.1a] for *Stage 1*. The  $\delta'_o$  value for *Stage 2*, which is associated with *Mask-Wearing*, is still quite small, being  $\sim 3.58X$  smaller than the least of the previous non-zero  $\delta_o$ -values. Additional *Mask-Wearing* by this substantially unvaccinated group would help end this pandemic wave faster.

The change in the value from  $\alpha_S$  to  $\alpha'_S$  is good, since it occurred without any significant new government mandates being put in place. Our best interpretation for what changed is that more of the previously vaccine-hesitant group have now become vaccinated. Thus,  $\alpha_S$  and  $\alpha'_S$  likely now measure vaccination effects as the primary new *Social Distancing* parameter.

Using Eq. [2.2a]-[2.2c], the USA Summer 2021 resurgence, by itself, gives a total number of new CoVID-19 resurgence cases:

$$N(10/11/2021) \approx [11, 303, 500], \quad [2.3a]$$

$$N(3/21/2022) \approx [22, 496, 000], \quad [2.3b]$$

$$N(3/21/2024) \approx [30, 721, 000], \quad [2.3c]$$

above the prior baseline. Adding these new resurgence-only results to our values for the prior USA CoVID-19 waves gives these updated predictions:

$$N_{TOTAL}(10/11/2021) \approx [44, 844, 000], \quad [2.4a]$$

$$N_{TOTAL}(3/21/2022) \approx [52, 188, 000], \quad [2.4b]$$

$$N_{TOTAL}(3/21/2024) \approx [52, 787, 000], \quad [2.4c]$$

for the total number of USA CoVID-19 cases. Using the latest overall USA CoVID-19 mortality rate (10/7/2021):

$$N_{Deaths}(10/7/2021) = [711, 498], \quad [2.5a]$$

$$N_{TOTAL}(10/7/2021) = [42, 208, 343], \quad [2.5b]$$

$$Mortality = 1.60942\%, \quad [2.5c]$$

then sets these future mortality estimates:

$$N_{Deaths}(3/21/2022) = [839, 900], \quad [2.6a]$$

$$N_{Deaths}(3/21/2024) = [849, 600], \quad [2.6b]$$

assuming no new 2021 Winter Resurgence occurs.

### 3 Summary

The USA Summer 2021 resurgence, which began around  $\sim 6/7/2021$ , persists to the *present-day* ( $\sim 10/7/2021$ ). Our initial model for this CoVID-19 wave ("Stage 1"), up through  $\sim 8/15/2021$ , as given in our prior pre-print<sup>5</sup>, identified this CoVID-19 wave as being primarily among the unvaccinated. Our analysis also showed that this subgroup was practicing very little *Social Distancing*, with virtually NO Mask-Wearing.

The most recent data for this CoVID-19 wave ("Stage 2"), as analyzed here, shows that the period of  $\sim 8/13/2021$  through the *present-day*, has a significant "flattening of the curve", as was shown in Figure 1. The new  $\alpha'_S$  *Social Distancing* parameter for this *Stage 2* of the USA Summer 2021 resurgence is about 6.67X larger than the  $\alpha_S$  value for the prior *Stage 1*. As this change in the *Social Distancing* parameter value was not associated with any new government mandates, this change is likely due to increased vaccination among the CoVID-19 susceptible population. Thus, the  $\alpha_S$  model parameter in Eq. [1.3a] may now track vaccination rates.

However, as shown in Figure 2, the *present-day*  $\delta'_o$  value, which is associated with *Mask-Wearing*, is one of the smallest non-zero values found so far, for any USA CoVID-19 wave. It is  $\sim 3.58X$  smaller than all prior non-zero  $\delta_o$ -values, indicating that more *Mask-Wearing* by this substantially unvaccinated group is also warranted.

These parameter values give these updated predictions:

$$N_{TOTAL}(3/21/2022) \approx [52, 188, 000], \quad [3.1a]$$

$$N_{TOTAL}(3/21/2024) \approx [52, 787, 000], \quad [3.1b]$$

for the total number of USA CoVID-19 cases. The *present-day* USA CoVID-19 mortality rate of 1.6094%, gives these future mortality estimates:

$$N_{Deaths}(3/21/2022) = [839, 900], \quad [3.2a]$$

$$N_{Deaths}(3/21/2024) = [849, 600], \quad [3.2b]$$

assuming no new 2021 Winter Resurgence occurs.

## 4 List of Figures

*Fig. 1: The USA CoVID-19 Summer 2021 Resurgence, By Itself.*

*Fig. 2: USA CoVID-19 Totals: 3/21/2020 through 10/7/2021.*

*Fig. 3: Summary of CoVID-19 Model and Parameter Values.*

## 5 References

1. <https://medrxiv.org/cgi/content/short/2020.05.04.20091207v1>  
“Initial Model for the Impact of Social Distancing on CoVID-19 Spread”
2. <https://medrxiv.org/cgi/content/short/2020.06.30.20143149v1>  
“Orthogonal Functions for Evaluating  
Social Distancing Impact on CoVID-19 Spread”
3. <https://medrxiv.org/cgi/content/short/2020.08.07.20169904>  
“Model to Describe Fast Shutoff of CoVID-19 Pandemic Spread”
4. <https://medrxiv.org/cgi/content/short/2020.09.16.20196063>  
“Initial Model for USA CoVID-19 Resurgence”
5. <https://medrxiv.org/cgi/content/short/2021.08.16.21262150>  
“The *IHME* vs Me: Modeling USA CoVID-19 Spread,  
Early Data to the *Fifth Wave*”

**Fig. 1: The USA CoVID-19 Summer 2021 Resurgence, By Itself**

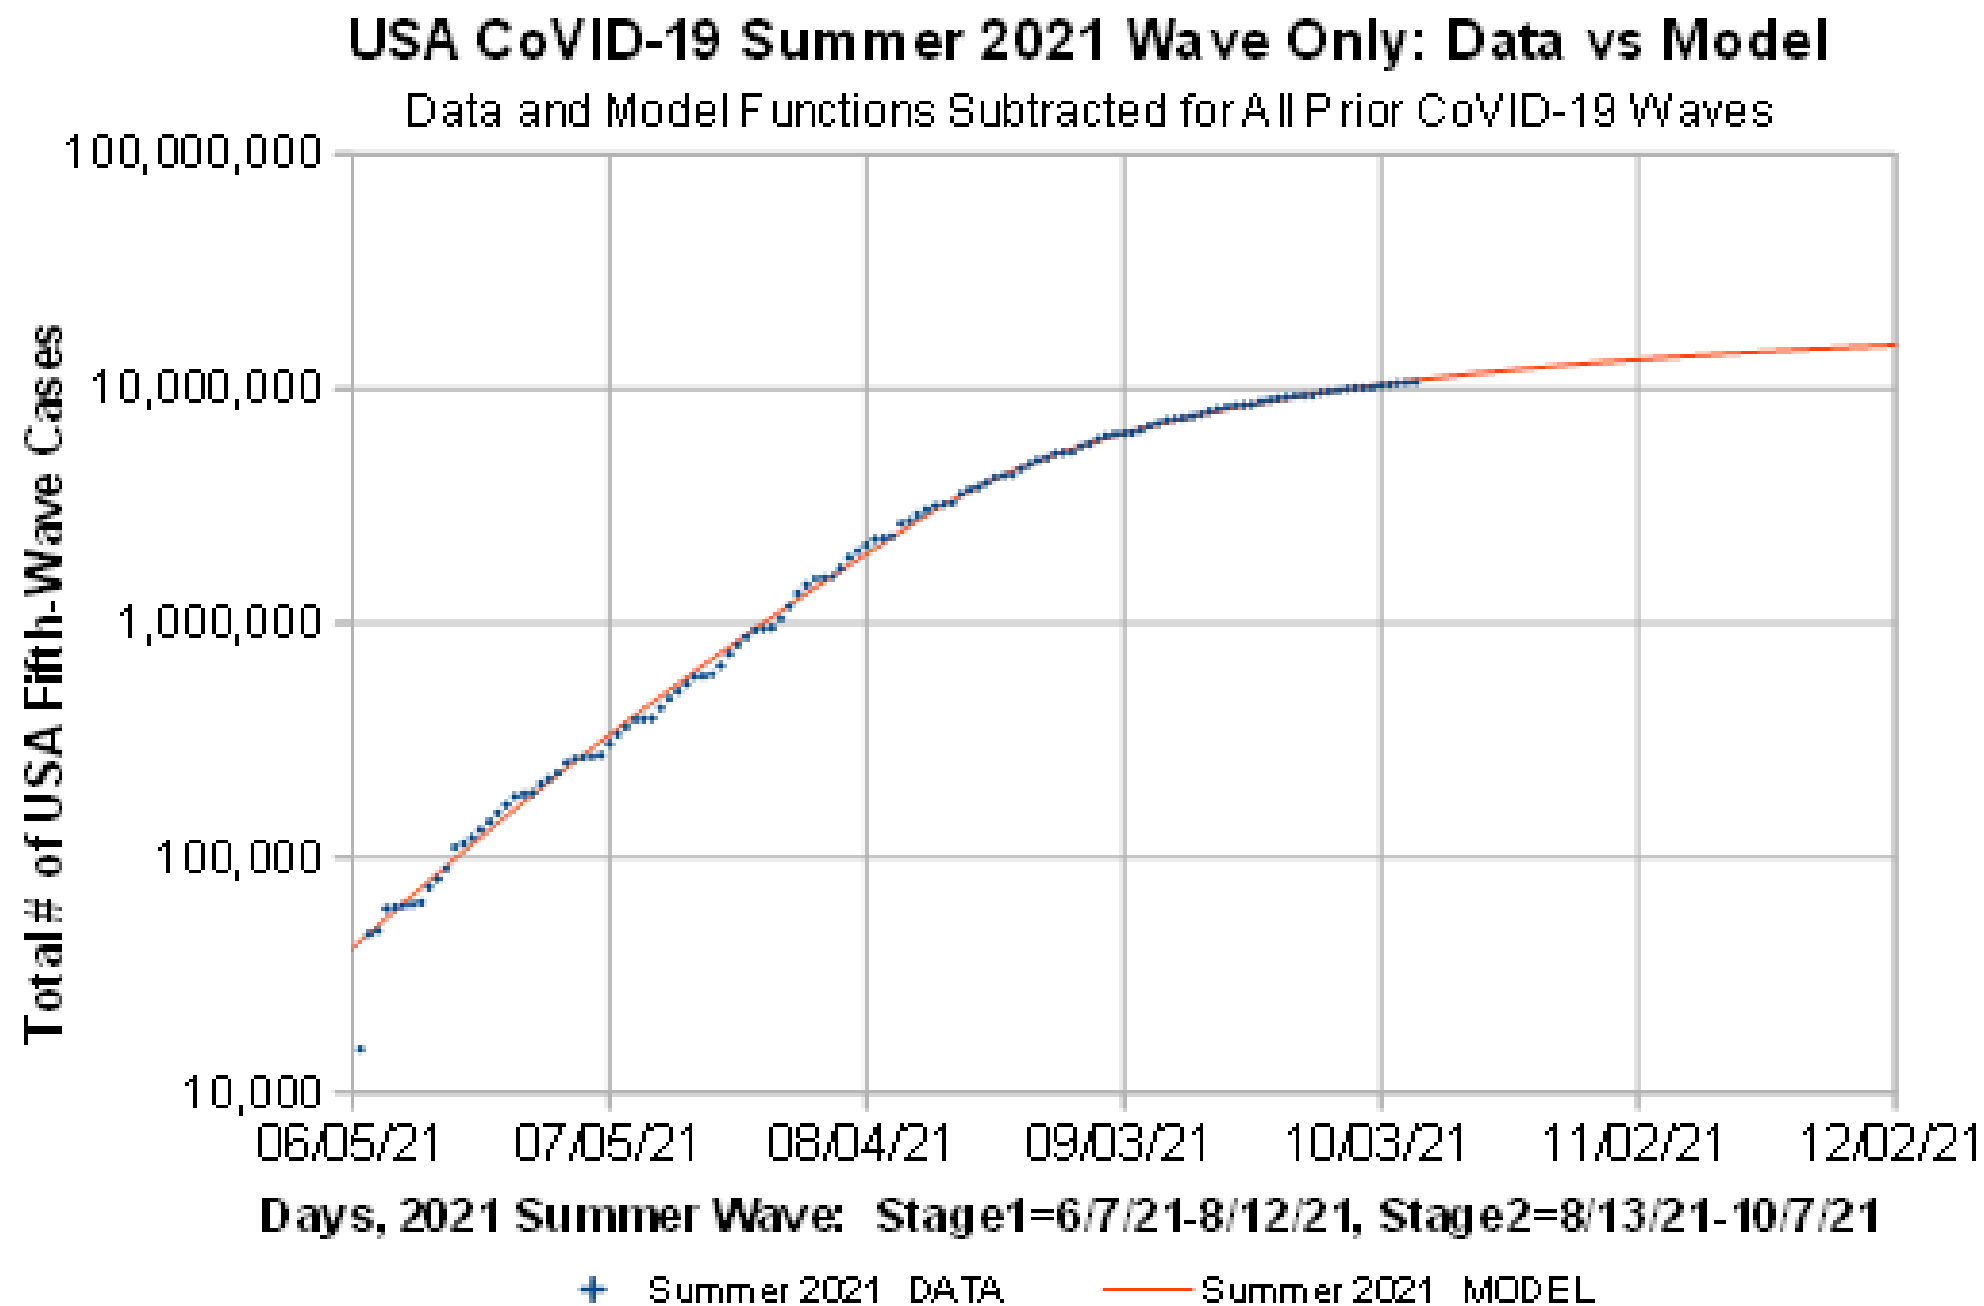

**Fig. 2: USA CoVID-19 Totals: 3/21/2020 through 10/7/2021**

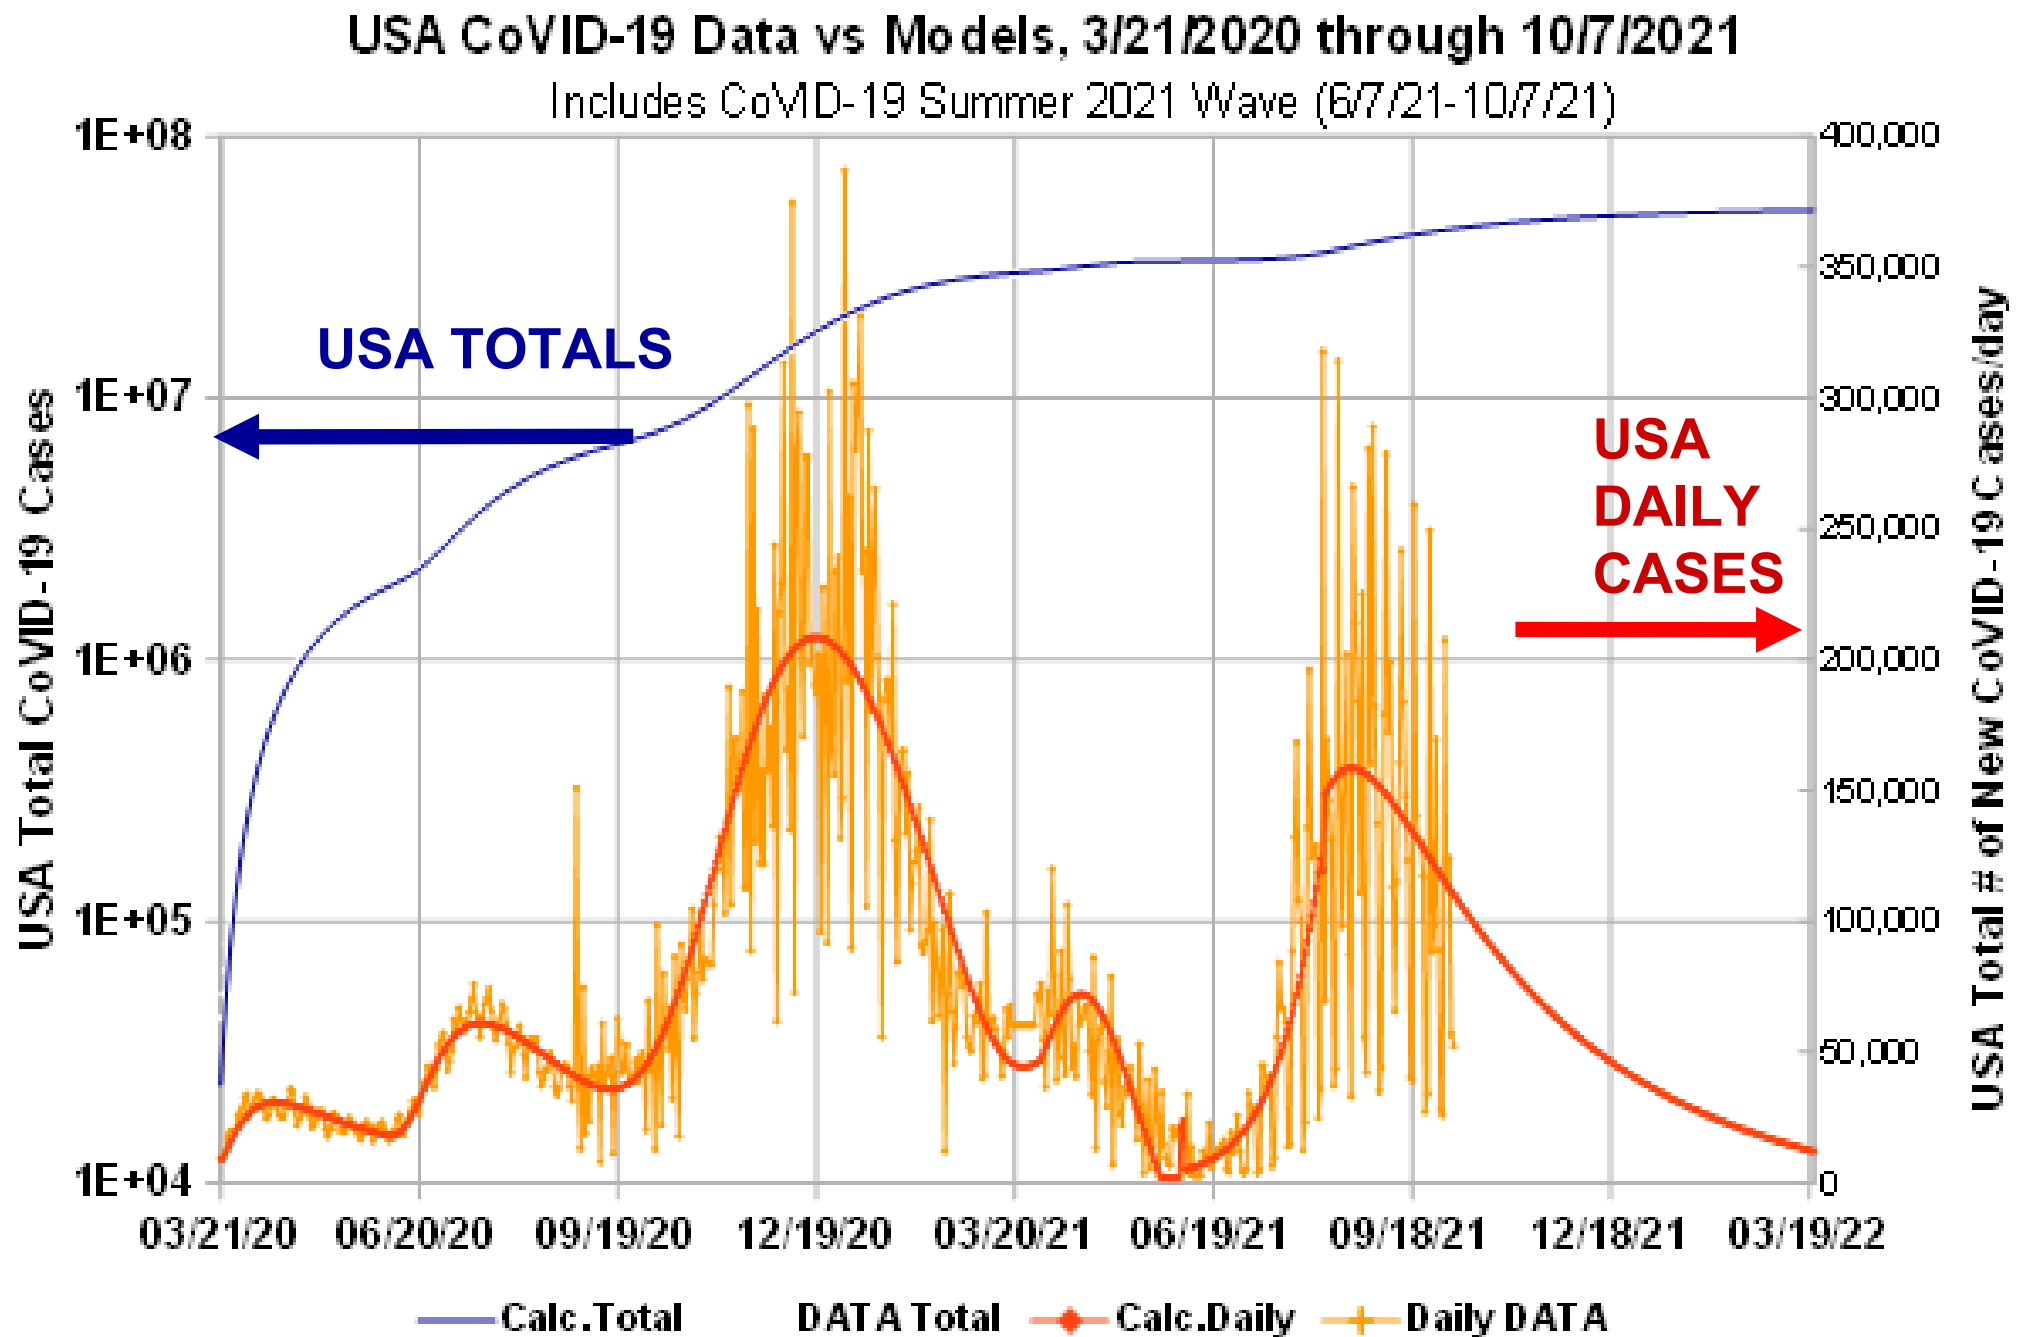



**Fig. 3: Summary of CoVID-19 Models and Parameter Values**

| Index | U.S.A. CoVID-19 Stage                                    | $N_0$ , (Initial $t=0$ Value) | $t=0$ Date | $t/dbl$ days, at $t=0$ | $t_R$ value | $\alpha_S$ value | $\delta_o$ value |
|-------|----------------------------------------------------------|-------------------------------|------------|------------------------|-------------|------------------|------------------|
| 1     | IniModel 6/7/20 Update                                   | 23,710                        | 03/21/2020 | 1.99657                | 2.88044     | 0.06618          | 0.00000          |
| 2     | 1 <sup>st</sup> Resurg Summer=>                          | 15,650                        | 06/07/2020 | 2.88000                | 4.15496     | 0.058__          | 0.0108_          |
| 3     | 2 <sup>nd</sup> Resurg Winter=>                          | 88,900                        | 09/25/2020 | 5.57983                | 8.05__      | 0.011__          | 0.001748         |
| 4     | 3 <sup>rd</sup> Resurg Spring=>                          | 146,000                       | 03/19/2021 | 5.57983                | 8.05__      | 0.00128          | 0.01365          |
| 5     | 4 <sup>th</sup> Major Wave: Inital Portion, Summer '21=> | 41,000                        | 06/07/2021 | 9.08924                | 13.113_     | 0.0030_          | 0.00000          |
| 6     | 4 <sup>th</sup> Major Wave: Latter Portion, Summer '21=> | 3,200,000                     | 08/13/2021 | 14.44339               | 20.83740    | 0.019999         | 0.000489         |
